# Supplementary material for: Hypouricemic effect of gallic acid, a bioactive compound fromSonneratia apetalaleaves and branches, on hyperuricemic mice
Source: Royal Society of Chemistry journal article supplement (doi:10.1039/d2fo02068h), 2022-01-01

**Hypouricemic effect of Gallic acid, a bioactive compound from *Sonneratia  
apetala* Leaves and Branches, on hyperuricemic mice**

**---Original images for WB**

Contents

|                               |    |
|-------------------------------|----|
| Renal tissues.....            | 2  |
| Renal URAT1.....              | 2  |
| Renal GLUT9.....              | 3  |
| Renal ABCG2.....              | 4  |
| Renal $\beta$ -actin.....     | 5  |
| Renal OAT1.....               | 6  |
| Renal OAT3.....               | 7  |
| Renal $\beta$ -actin.....     | 8  |
| Intestine tissues.....        | 9  |
| Intestine URAT1.....          | 9  |
| Intestine GLUT9.....          | 10 |
| Intestine $\beta$ -actin..... | 11 |

## Renal URAT1

1

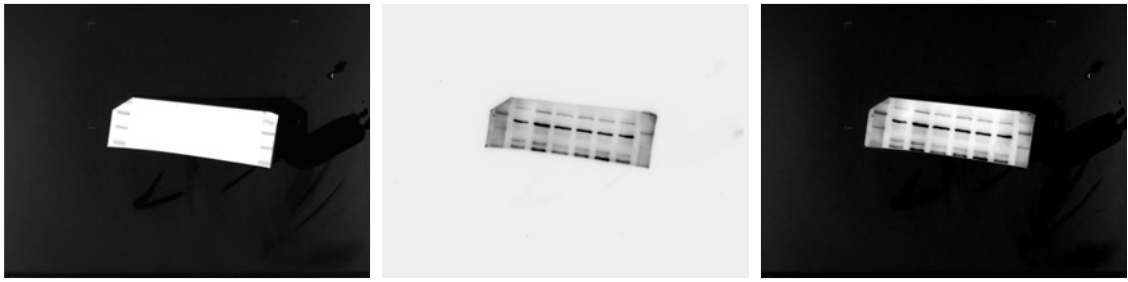

2

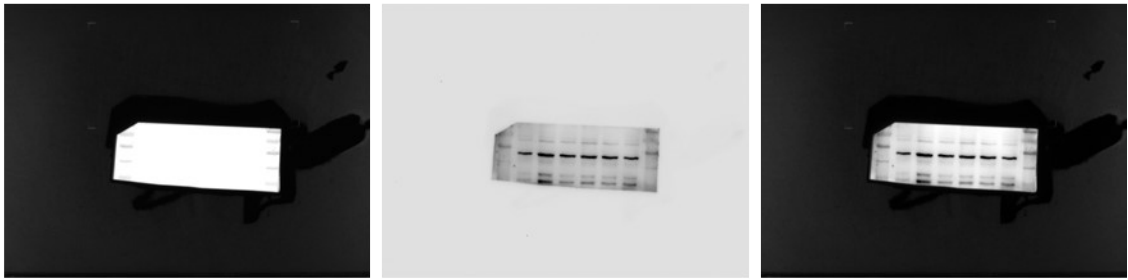

3

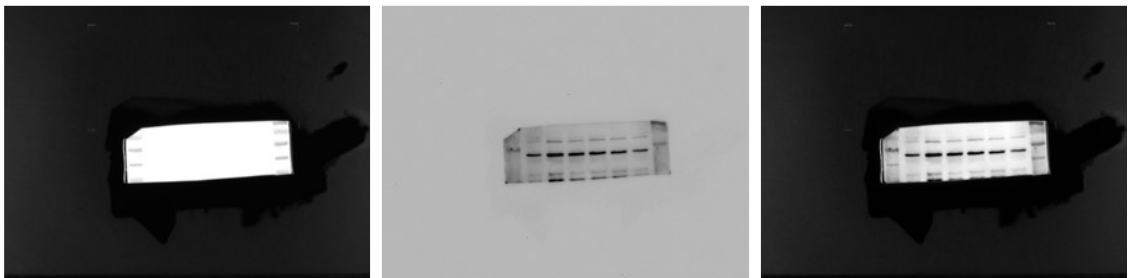

## Renal GLUT9

1

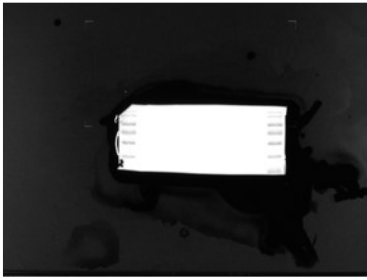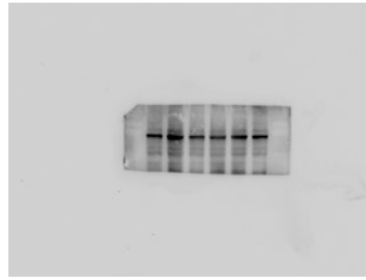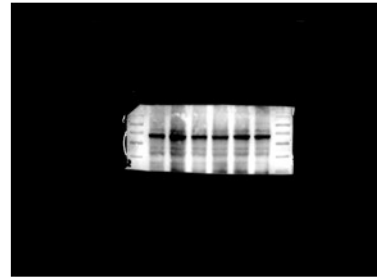

2

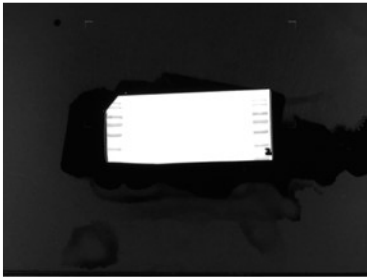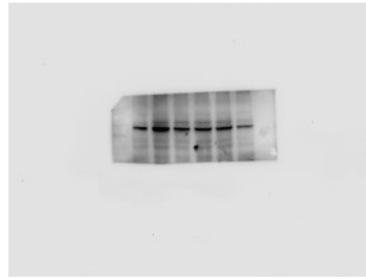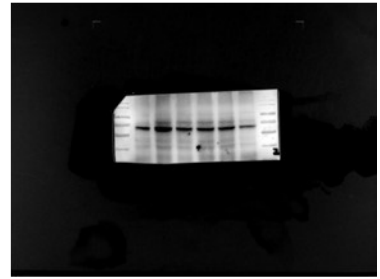

3

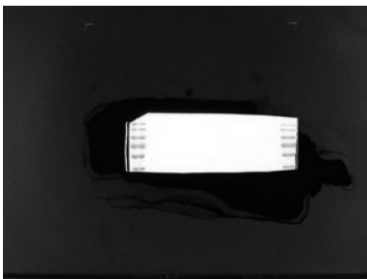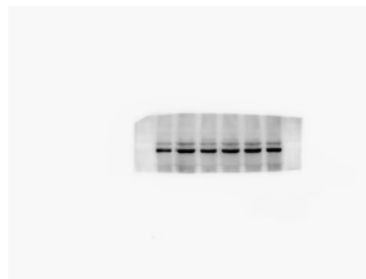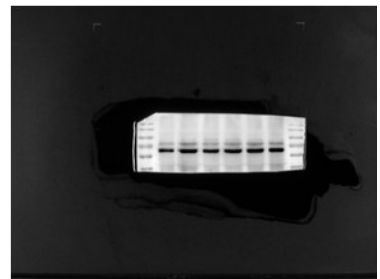

## Renal ABCG2

1

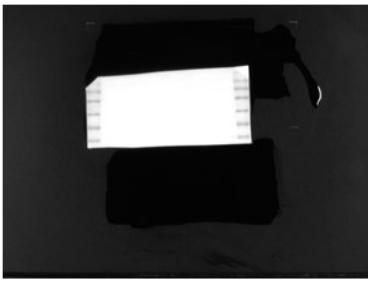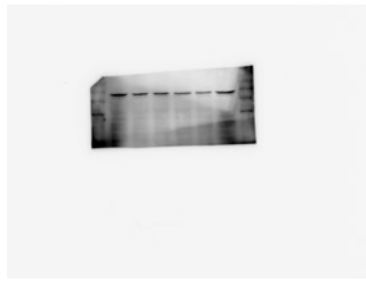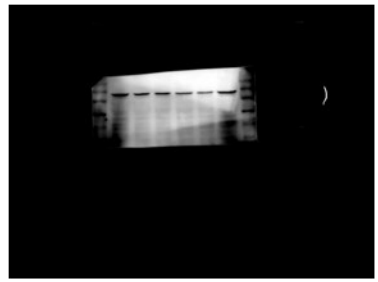

2

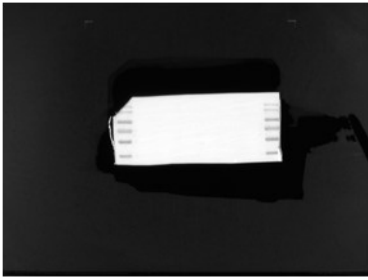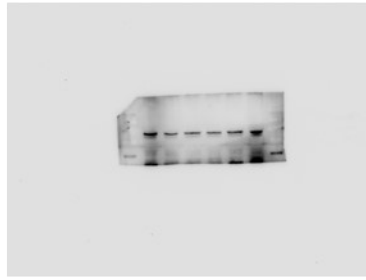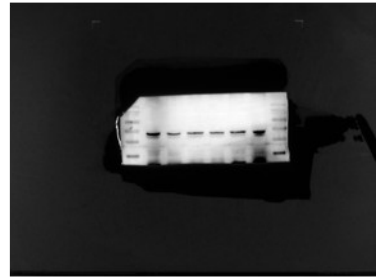

3

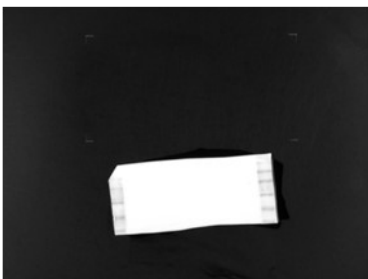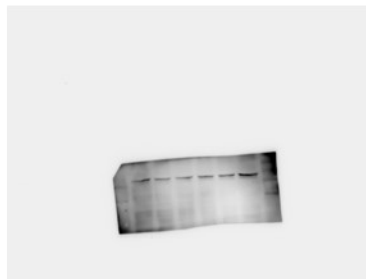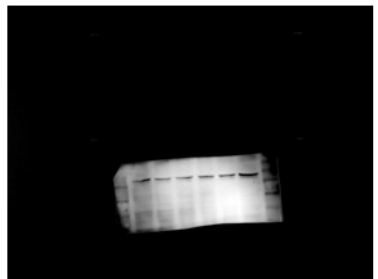

Renal  $\beta$ -actin

1

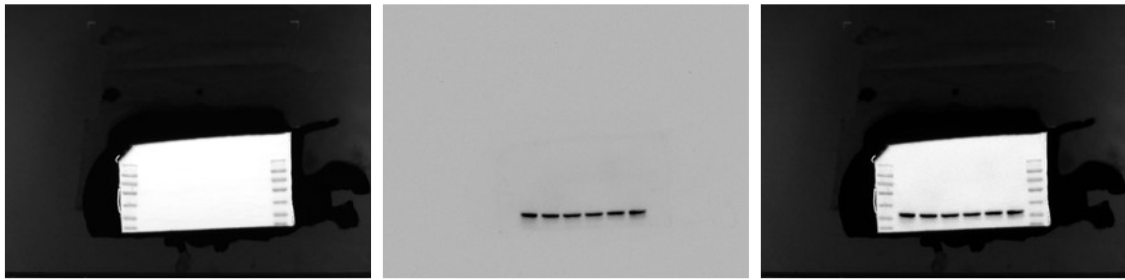

2

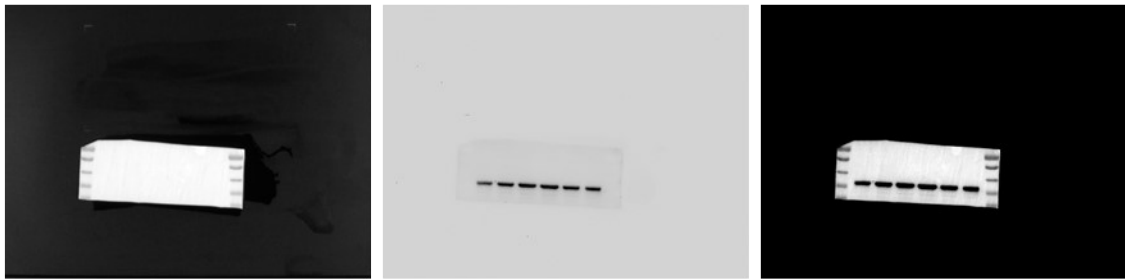

3

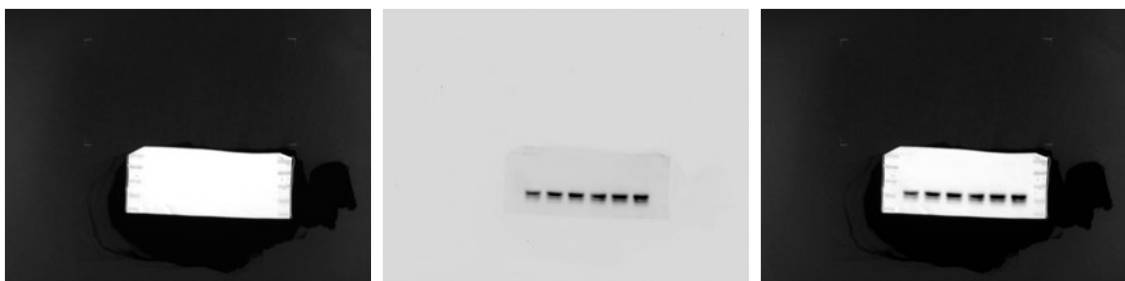

**Renal OAT1**

1

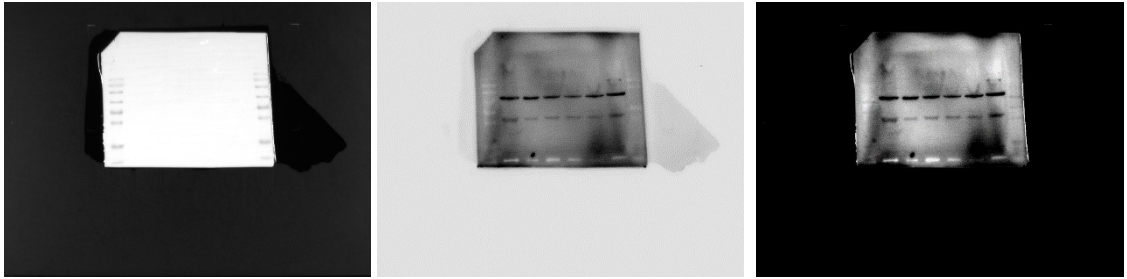

2

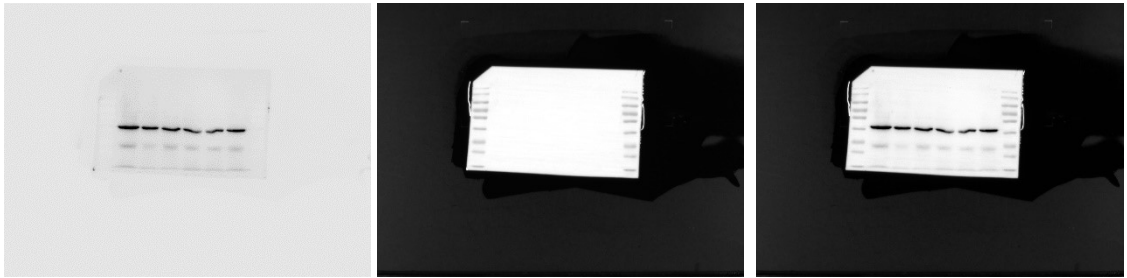

3

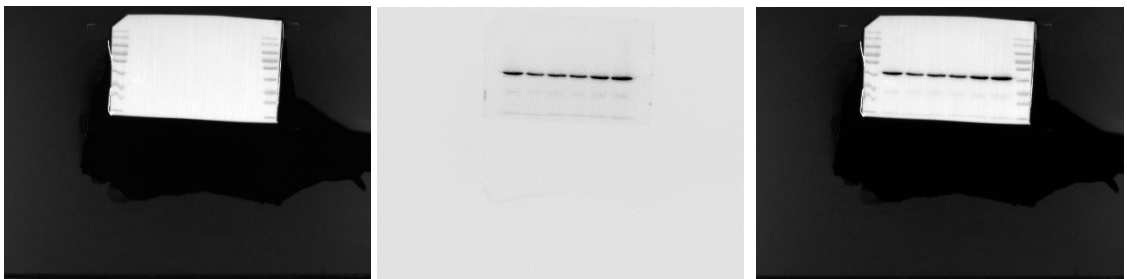

## Renal OAT3

1

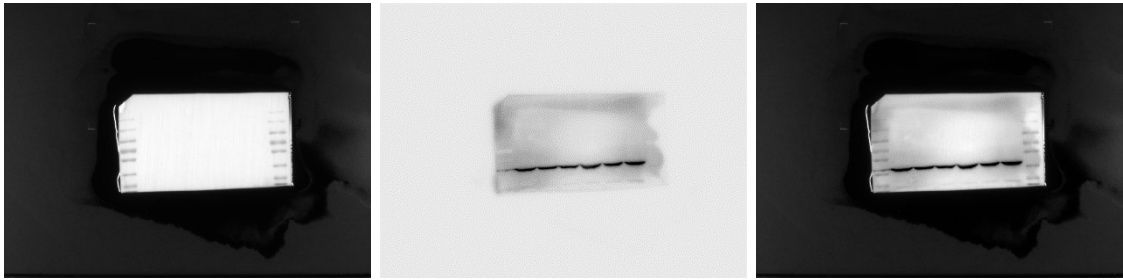

2

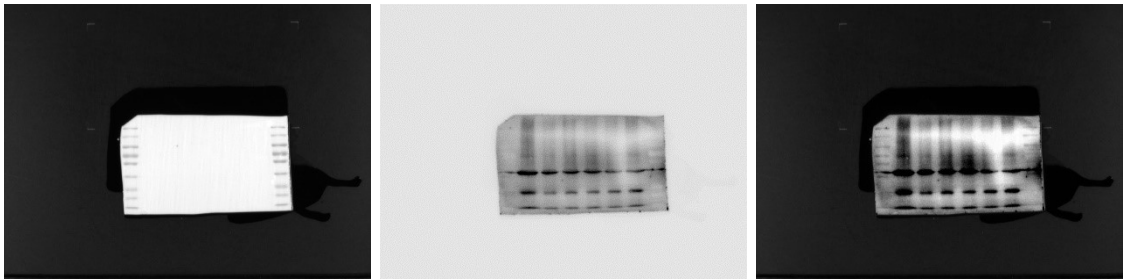

3

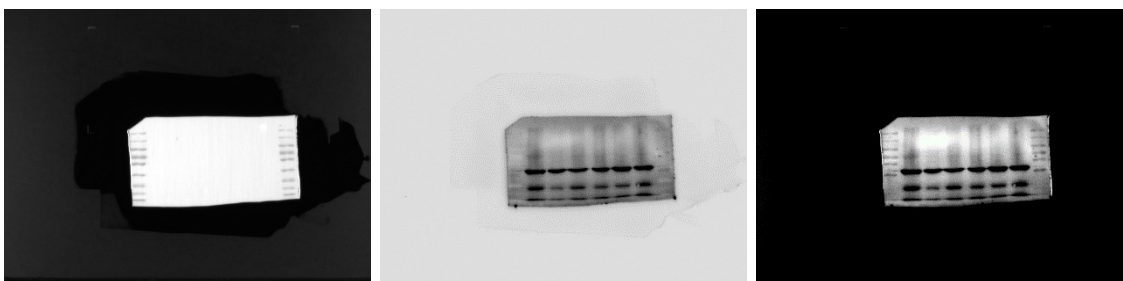

Renal  $\beta$ -actin

1

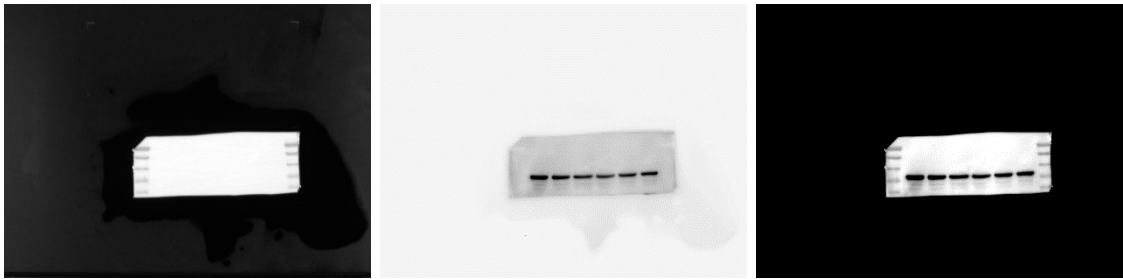

2

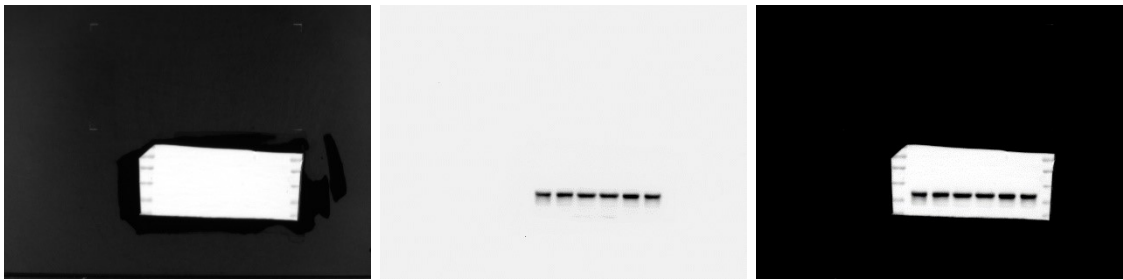

3

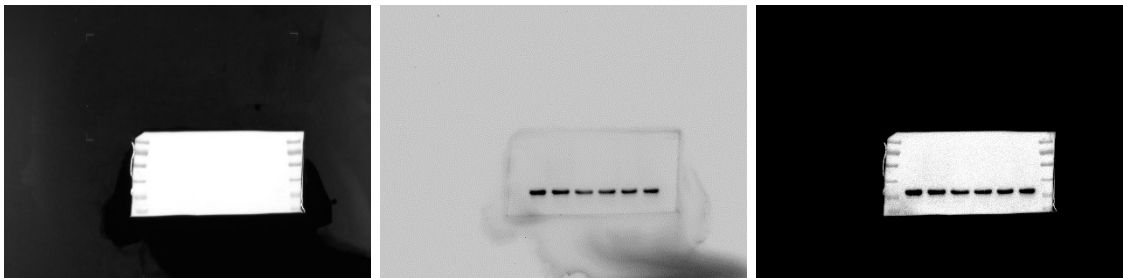



## Intestine GLUT9

1

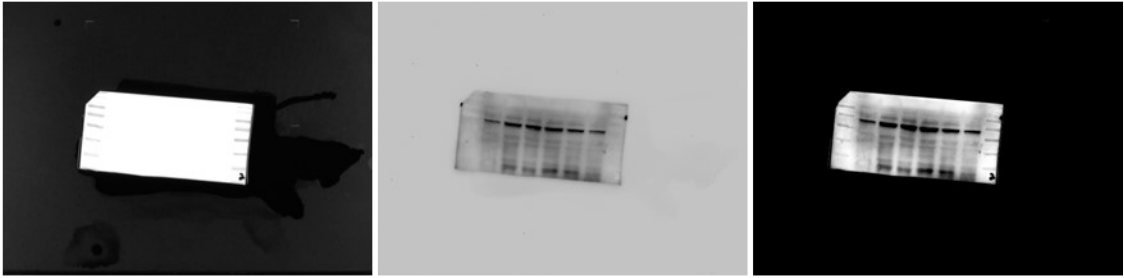

2

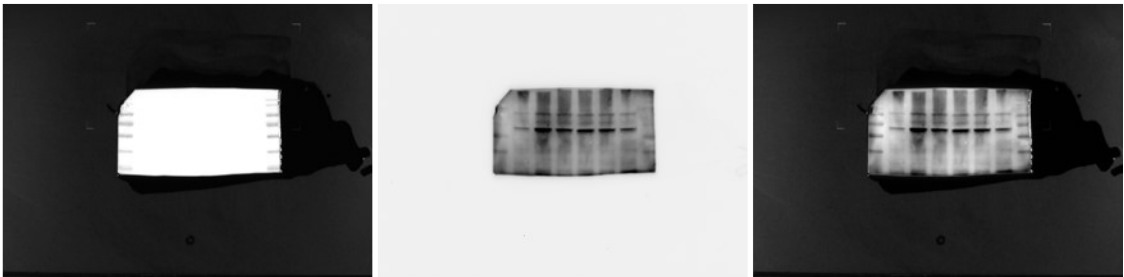

3

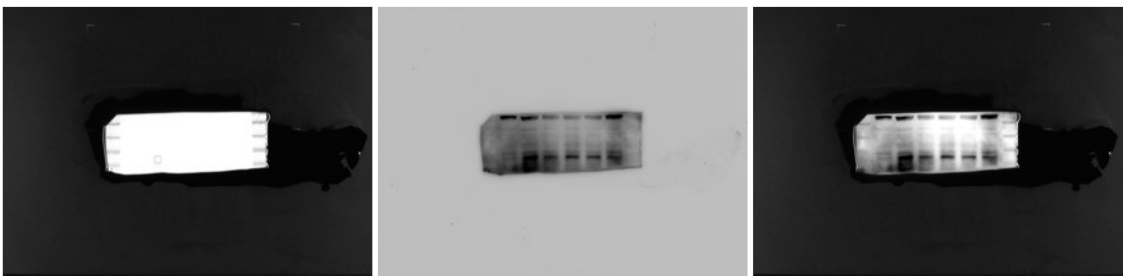

# Intestine ABCG2

1

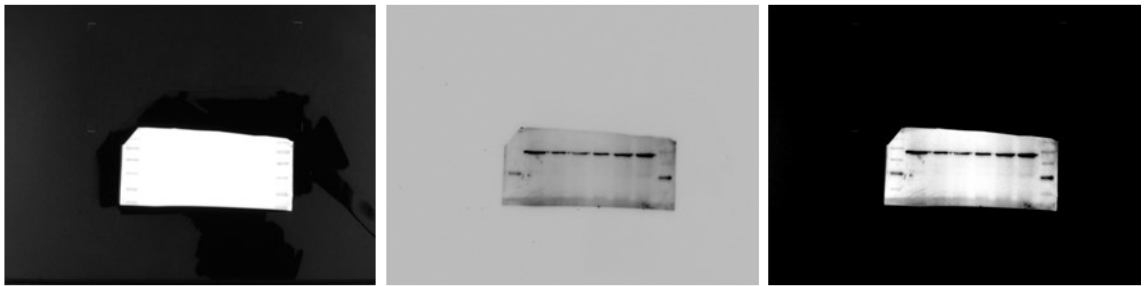

2

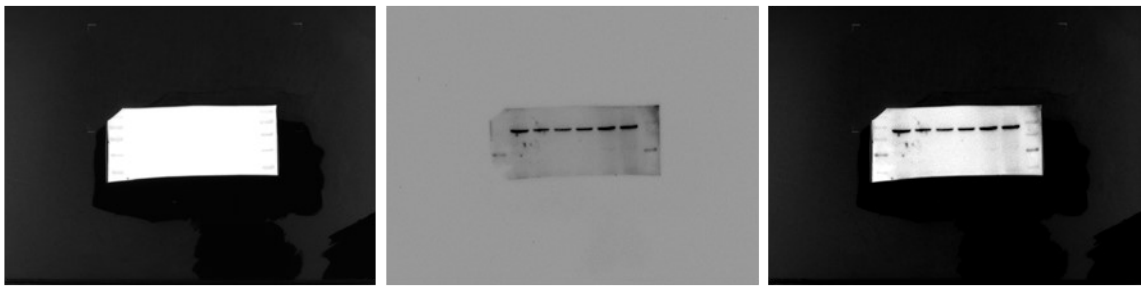

3

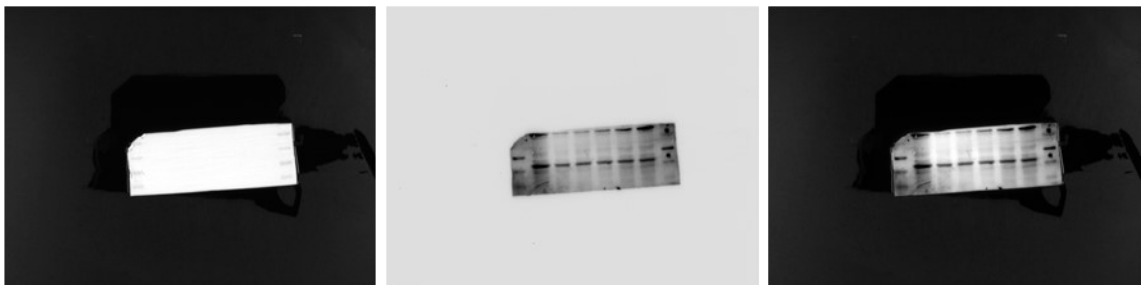

Intestine  $\beta$ -actin

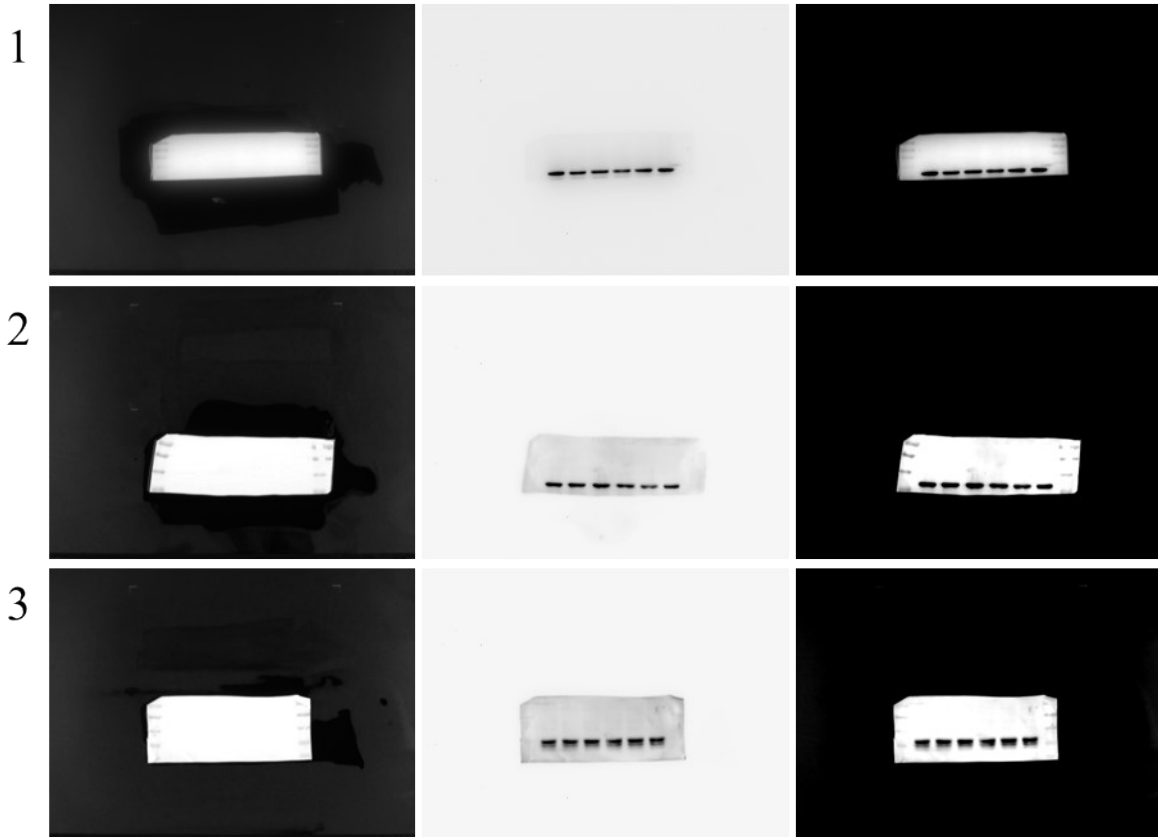

Supplement: d2fo02068h1.pdf [file d2fo02068h1.pdf]
